# Supplementary material for: Directed Differentiation of Mobilized Hematopoietic Stem and Progenitor Cells into Functional NK Cells with Enhanced Antitumor Activity
Source: PubMed Central journal article supplement (PMC7226771; doi:10.3390/cells9040811), 2020-03-27
Supplement: cells-09-00811-s001.pdf [file cells-09-00811-s001.pdf]

# Directed Differentiation of Mobilized Hematopoietic Stem and Progenitor Cells into Functional NK cells with Enhanced Antitumor Activity

Pranav Oberoi, Kathrina Kamenjarin, Jose Francisco Villena Ossa, Barbara Uherek, Halvard Bönig and Winfried S. Wels

## Supplementary data

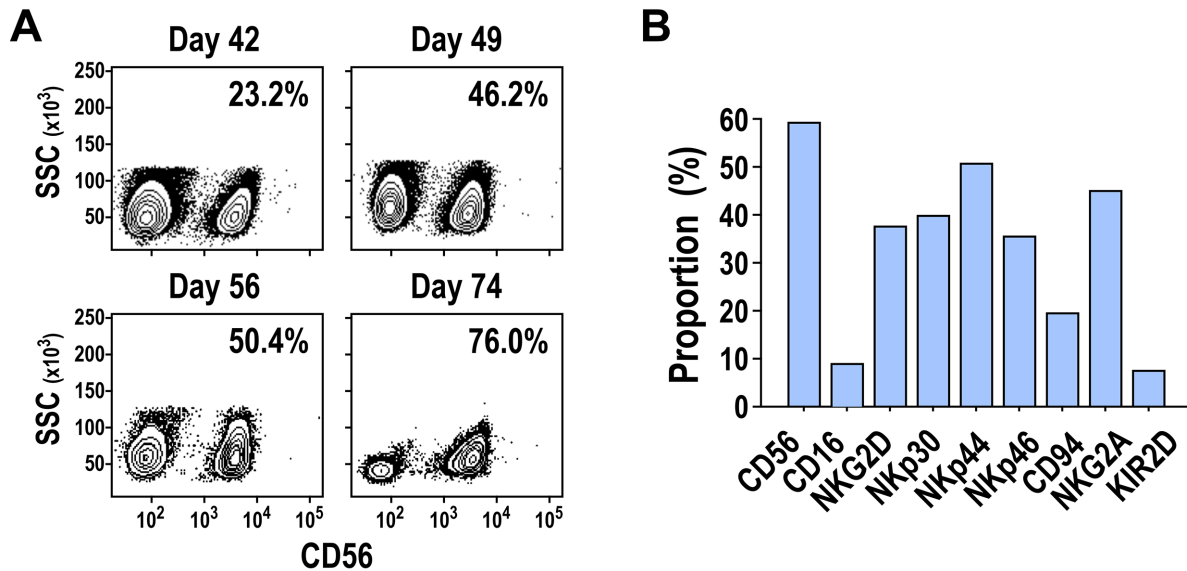

**Supplementary Figure S1.** *Ex vivo* generation of NK cells from bone marrow-derived hematopoietic progenitors. **(A)** CD34<sup>+</sup> cells were isolated from bone marrow (BM) aspirate of a healthy donor employing the same selection protocol as described in Materials and Methods for mobilized PB-CD34<sup>+</sup> cells. Enriched BM-CD34<sup>+</sup> cells were subsequently cultured following the scheme depicted in Figure 1A. Development of CD56<sup>+</sup> NK cells was analyzed at the indicated time points of the culture period by flow cytometry. **(B)** Surface expression of NK-cell-associated receptors by cells generated *ex vivo* from BM-CD34<sup>+</sup> cells was analyzed by flow cytometry (cells from day 67 of the culture).

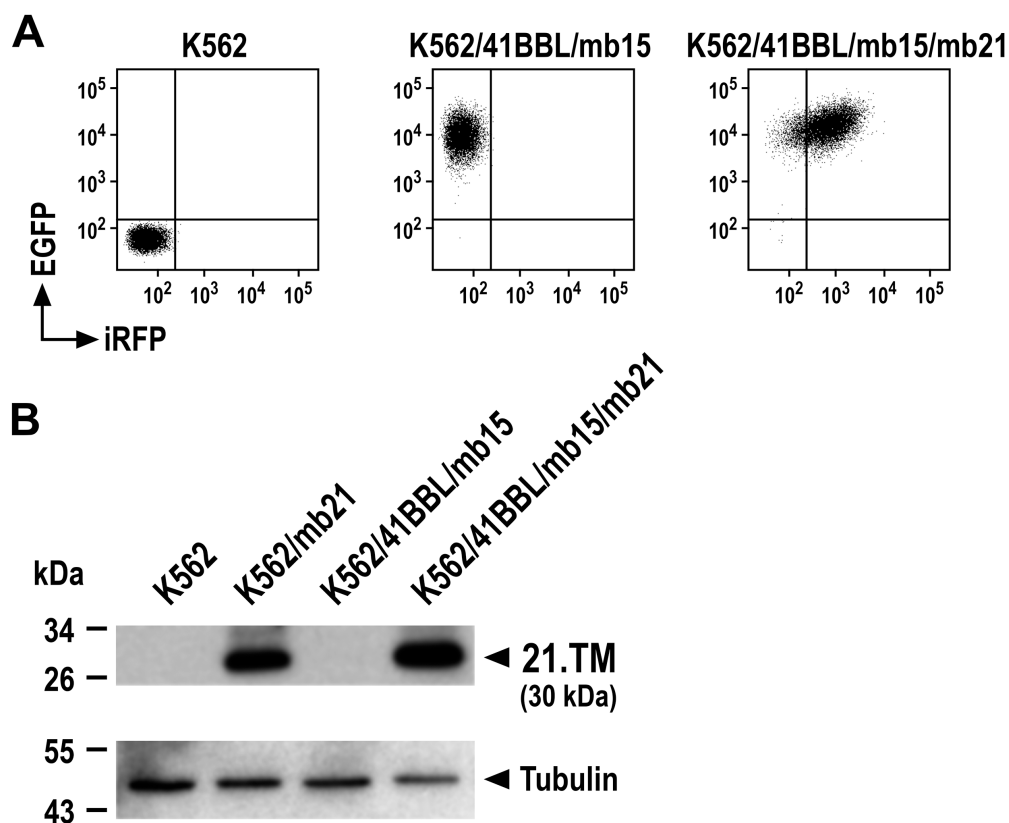

**Supplementary Figure S2.** Expression of IL-21 by genetically modified K562/41BBL/mb15/mb21 feeder cells. (A) After transduction of EGFP-positive K562/41BBL/mb15 cells (middle panel) with pS-21.TM-IRW lentiviral vector encoding membrane-anchored IL-21 and iRFP as a marker, EGFP/iRFP-double positive K562/41BBL/mb15/mb21 cells were enriched by flow cytometric cell sorting and re-analyzed for EGFP and iRFP expression (right panel). Parental K562 cells served as control (left panel). (B) Expression of membrane-anchored IL-21 (21.TM) by sorted K562/41BBL/mb15/mb21 cells was investigated by immunoblot analysis of cell lysates with a CD8 $\alpha$ -specific antibody detecting the hinge region of the molecule. Parental K562 cells, K562 cells transduced with the pS-21.TM-IRW vector and K562/41BBL/mb15 cells were included as controls.  $\gamma$ -Tubulin was analyzed as a loading control.

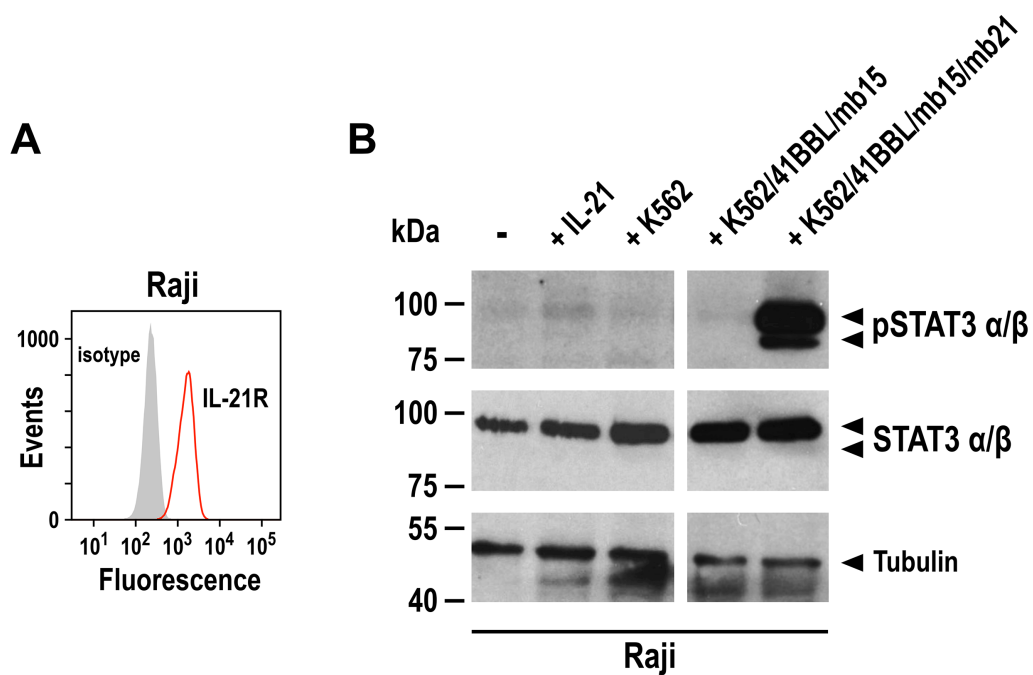

**Supplementary Figure S3.** Activation of STAT3 upon exposure of Raji cells to K562/41BBL/mb15/mb21 feeder cells. **(A)** Expression of IL-21 receptor (IL-21R) on the surface of Raji Burkitt's lymphoma cells was determined by flow cytometry with fluorochrome-conjugated IL-21R-specific antibody (red solid line). Cells incubated with an isotype-matched control antibody (gray shaded area) served as control. **(B)** To determine IL-21 activity, Raji cells were incubated with K562/41BBL/mb15/mb21, K562/41BBL/mb15 or parental K562 cells at a 1:1 ratio for 30 minutes at 37°C. Raji cells stimulated with 10 ng/mL of recombinant IL-21 or left unstimulated were included as controls. Subsequently, cell lysates were prepared and subjected to immunoblot analysis using either anti-phospho-STAT3 (pSTAT3) or anti-STAT3 primary antibody followed by HRP-coupled secondary antibody and chemiluminescent detection.  $\gamma$ -Tubulin was analyzed as a loading control.

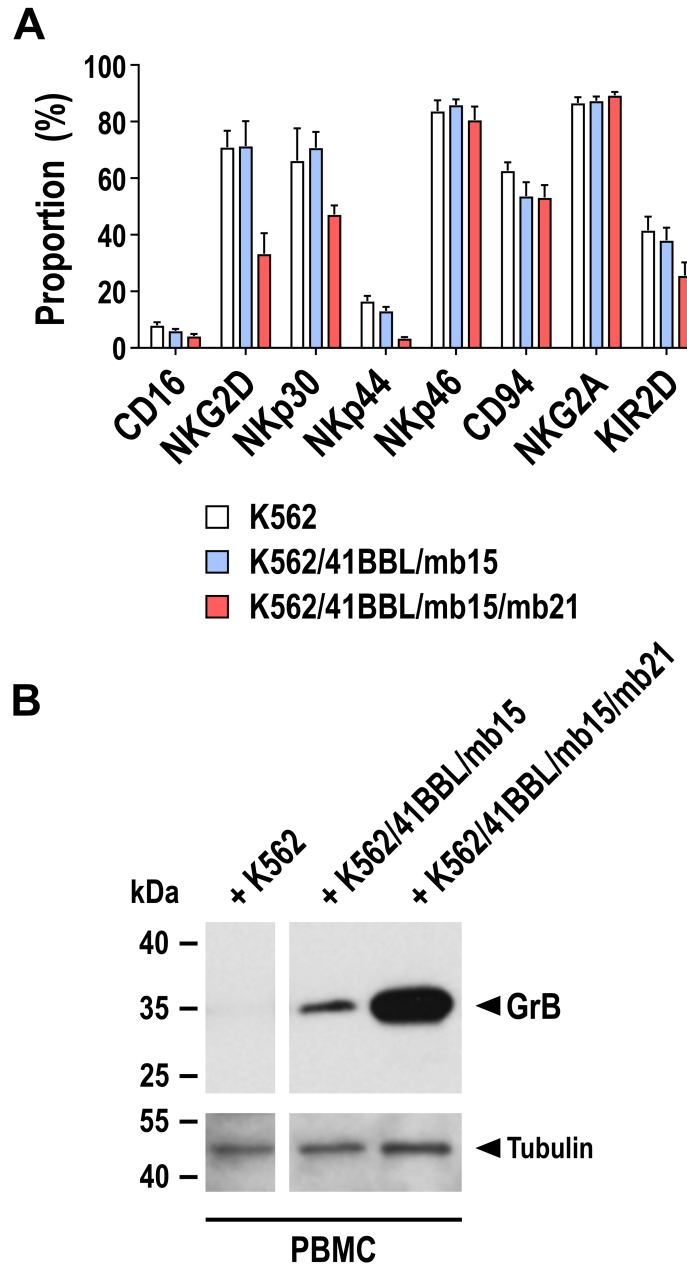

**Supplementary Figure S4.** Phenotypic characterization of peripheral blood-derived NK cells. **(A)** Surface expression of NK-cell associated receptors by CD56<sup>+</sup>CD3<sup>-</sup> cells expanded from PBMCs of healthy donors following seven days of co-culture with the indicated K562 feeder cells was analyzed by flow cytometry. Mean values  $\pm$  SEM are shown; n=9 individual donors. **(B)** Expression of granzyme B (GrB) by cells stimulated with the indicated feeder cells was investigated by immunoblot analysis of cell lysates with GrB-specific antibody.  $\gamma$ -Tubulin was analyzed as a loading control.

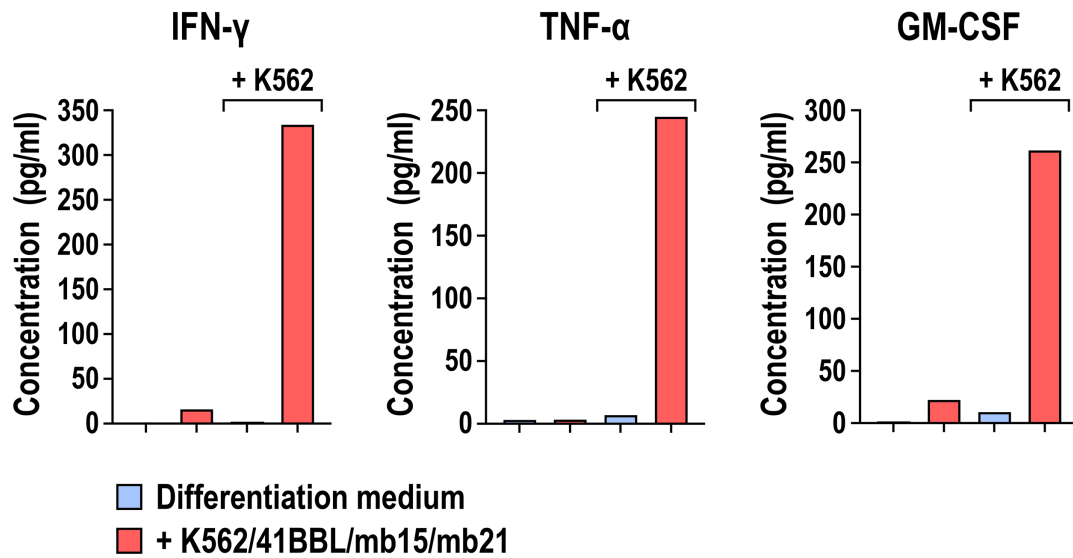

**Supplementary Figure S5.** Secretion of pro-inflammatory cytokines by *ex vivo* differentiated NK cells. CD56<sup>+</sup> NK cells ( $5 \times 10^5$ ) generated *ex vivo* from mobilized PB-CD34<sup>+</sup> cells by co-culture with K562/41BBL/mb15/mb21 feeder cells (red bars) or culture in cytokine-containing medium (blue bars) were incubated for 6 hours with K562 target cells at an effector to target (E/T) ratio of 1:1 in 1 mL of regular differentiation medium. Supernatants were collected, and the levels of interferon (IFN)- $\gamma$ , tumor necrosis factor (TNF)- $\alpha$ , and GM-CSF were determined using a BD Cytometric Bead Array and BD FACSArray bioanalyzer (BD Biosciences) according to the manufacturer's recommendations. PB-CD34<sup>+</sup>-derived NK cells kept without target cells were included as controls. Representative results obtained with cells from the same donor as in Figure 7C are shown.
